# Supplementary material
Source: PubMed Central journal article supplement (PMC8315080)
Supplement: NIHMS1714875-supplement-Supplementary_Material.pdf [file NIHMS1714875-supplement-Supplementary_Material.pdf]

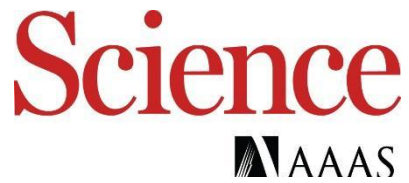

## Supplementary Materials for

### **QRICH1 Dictates the Outcome of ER Stress through Transcriptional Control of Proteostasis**

Kwontae You<sup>1</sup>, Lingfei Wang<sup>1</sup>, Chih-Hung Chou<sup>1</sup>, Kai Liu<sup>2,3</sup>, Toru Nakata<sup>2,3</sup>, Alok Jaiswal<sup>1</sup>, Junmei Yao<sup>2,3</sup>, Ariel Lefkovith<sup>1</sup>, Abdifatah Omar<sup>2,3</sup>, Jacqueline G. Perrigoue<sup>4</sup>, Jennifer E. Towne<sup>4</sup>, Aviv Regev<sup>5,6,\*</sup>, Daniel B. Graham<sup>1,2,3,\*</sup>, Rannik J. Xavier<sup>1,2,3,\*</sup>

Correspondence to: [xavier@molbio.mgh.harvard.edu](mailto:xavier@molbio.mgh.harvard.edu)

#### **This PDF file includes:**

Materials and Methods  
References 50-73  
Figs. S1 to S7  
Table S1 to S4 captions

#### **Other Supplementary Materials for this manuscript include the following:**

Table S1 to S4 (Excel)

## **Materials and Methods**

### **Mouse Colon Organoids Culture**

Rosa26-floxed STOP-Cas9 mice (stock 024857, Jackson Laboratories) were crossed with CMV-cre (stock 006054, Jackson Laboratories) to generate a mouse line with constitutive expression of Cas9 in all tissues. Colonic crypts were isolated from Cas9 mice and cultured as previously described (50). Briefly, crypts were isolated from mice by incubation of colons in 8 mM EDTA in phosphate buffered saline (PBS) for 60 min at 4°C, followed by manual disruption of the tissue by pipetting. Crypts were plated in 15 ul of Matrigel and maintained in 50% L-WRN conditioned media. Media was replaced every 2 days, and organoids were passaged every 3-4 days.

### **Mouse Colon Monolayer Culture**

Mouse colon monolayer culture has been previously described (51, 52). Briefly, day 3 colonic organoids were dissociated into single cells using TrypLE (ThermoFisher) and passed through a 70 mm filter into 50% L-WRN conditioned medium containing 10 mM Y27632.  $1.5 \times 10^5$  cells were plated on a 24-well transwell insert (Costar) coated with 1:40 Matrigel diluted in PBS. 150 ul of medium was added to the upper compartment and 600 ul of medium was added to the lower compartment. After 24 h, the media in both compartments was replaced with 50% L-WRN medium. After an additional 24 h, the media was replaced with 5% L-WRN medium to induce differentiation. Media was replaced daily, and day3 monolayers were used for the Tm treatment and scRNA-seq analysis.

### **Human Colon Organoids Culture**

Endoscopic biopsy samples were obtained from healthy donors enrolled in the Prospective Registry in IBD Study at MGH (PRISM). Written informed consent was obtained from study participants and the study protocols were reviewed and approved by the Mass General Brigham Human Research Committee (#2004-P-001067). Human colon spheroids were established and maintained as previously described (53) with a slight modification. Briefly, biopsy samples were washed with PBS containing penicillin (100 units/ml), streptomycin (0.1 mg/ml) and gentamicin (50 ug/ml) for 5 min at room temperature. After three washings with PBS, tissues were incubated with 5 mM EDTA in PBS for 45 mins at 4°C. After wash with PBS, several pipetting yielded supernatants enriched in colonic crypts. Crypts were pelleted by centrifugation at 200 g for 5 mins and then plated in 15 ul of Matrigel (Corning) and maintained in 500 ul of 50% L-WRN conditioned media (50) supplemented with 10 uM Y-27632 (R&D systems, cat# 1254) and 10 uM SB431542 (Tocris Bioscience, 1614). Medium was changed every 2-3days and organoids were passaged to 1: 3 using TrypLE every 7 days.

### **Dissociation of monolayer for scRNA-seq**

Monolayers were scraped out using a 200 ul pipet tip and incubated in 5 mM DTT and EDTA–PBS on ice for 30 min, shaking every 10 min. Cells were resuspended with TrypLE and incubated for 3 min at 37°C. After inactivating the trypsin, single cells were resuspended in MACS buffer and then passed through a 40 µm filter. Cell number was counted after enriching for live cells using EasySep Dead cell removal Kit (STEMCELL Tech, 17899).

### **scRNA-seq data processing**

Cellranger was used to process the readout separately for each lane. The lanes were aggregated using “cellranger aggr --normalize=mapped”. We removed lowly expressed genes, as defined by total UMI read count across all cells less than 300 or proportion of cells with nonzero UMI reads less than 0.2%.  $\text{Log}(\text{CPM}+1)$  was computed for downstream analyses.

### **scRNA-seq cell clustering and tSNE plot**

Each replicate and treatment was regarded as a categorical covariate and the log UMI count as a continuous covariate for each cell, and removed from  $\text{log}(\text{CPM}+1)$ . The resulting matrix was reduced to 20 dimensions using principal component analysis, from which cells were clustered using louvain method in SCANPY(54) and reduced to 2 dimensions using tSNE for visualization.

### **scRNA-seq cell-type identification**

Cell types of each cluster were determined according to post-covariate-removal expression levels of previously annotated marker genes (55). Two clusters were identified as empty droplets based on marker gene expression, mitochondria mapped gene expression, the number of UMIs, and cluster size, and was consequently removed from downstream analyses.

### **scRNA-seq GO program activity level**

For GO categories, we used the average CPM of genes within this GO and all of its sub-categories as its activity level.

### **scRNA-seq maximal discriminating axes (MDAs)**

For a given cell-type, the maximal discriminating axis provides the strongest linear discriminating power between two groups, assuming a normal noise distribution. The average expression level was obtained from  $\text{log}(\text{CPM}+1)$  for each gene in each treatment. The maximal discriminating axes were computed as the differences of the average expression level between treatment pairs. Each cell was then mapped onto the MDAs by inner product. The MDAs and cell coordinates are computed separately for each cell-type and not comparable across cell-types. The complete source code for MDA analysis can be found at Zenodo (56).

### **scRNA-seq transcriptomic profiles for treatments**

For each cell type, using the 2-dimensional transcriptional coordinates on the MDAs of every cell, a linear discriminant analysis model was trained against treatment and predicted on the same cells. The predicted treatment class probabilities were visualized in triangular plots, where stronger overlap between treatments indicates less distinguishability between the treatments based on their transcriptomic profiles.

### **scRNA-seq gene differential expression**

Each replicate was regarded as a categorical covariate, and log UMI count as a continuous covariate for each cell. For differential expression between the two treatments, samples were limited to these treatments, covariates were removed from  $\text{log}(\text{CPM}+1)$  of each gene and from the treatment variable, and their Pearson correlation was computed. P-values were obtained empirically with  $10^7$  random permutations on post-covariate-removal data. LogFC was determined as the coefficient of linear regression of  $\text{log}(\text{CPM}+1)$  on treatment, after covariate removal.

### **Putative UPR regulators in scRNA-seq**

The criteria for putative positive UPR regulators are: induced in Tm-13 h vs. DMSO with p-value < 0.05 and FC > 1.5 in enterocytes and goblet cells and, in Tm-25 h v.s. Tm-13 h, having FC in goblet cells lower than that in enterocytes.

### **Generation of reporter cell lines using CRISPR knock-In method**

Repair template dsDNA was designed to contain the P2A-GFP sequence and the guide RNA sequences targeting the C-terminal region of XBP1s and synthesized it from Integrated DNA Technologies (IDT). 30 pmol of tracrRNA and crRNA were mixed in duplexing buffer (IDT) and incubated at 50°C for 1 min and 37°C for 10 min. We mixed 30 pmol of recombinant Cas9 protein (PNA Bio. CP02) with 30 pmol of gRNA duplex and incubated for 10 min at room temperature (RT). Following RNP formation, equimolar amount of repair template DNA was added and incubated for 10 min at RT. We transfected the RNP complex into HT29 cells using the Lonza 4D-nucleofector kit (V4XC-2032) according to the manufacturer's protocol (SF solution with FF-137 program). We cultured HT-29 cells in Glutamax DMEM medium (Invitrogen, 10569044) supplemented with 10% heat-inactivated FBS (Invitrogen), penicillin/streptomycin (100U/ml, Invitrogen, 15140163).

### **XBP1s Screen with CRISPR library**

On day 0, the pooled lentiviral library was transduced at an MOI of 0.2 into 40 million HT29 XBP1s-GFP cells, which infected one virus per cell with over 100 coverage of the library. On day 2, transduced cells were selected by adding puromycin (Invitrogen) at 5 ug/ml. On day 5, we replated the cells with fresh media.

For the XBP1s-GFP screen, cells were treated with DMSO or 0.25 ug/ml of tunicamycin (Tm) for 14 h. Single cells were filtered (40 um) and stained with DAPI just before the sort to select the live cell fraction. Cells were sorted based on the GFP intensities using FACS (Sony SH800S cell sorter) as shown in Figure S2B, into high or low bins containing 15% of the cells. Approximately 15 million cells were collected per bin (a representation of over 200 coverage of the library).

### **Preparation of gDNA for Next-generation sequencing**

gDNA was extracted from the cells using DNazol (ThermoFisher, 10503027) according to the manufacturer's instructions and the DNA library was prepared as previously described (57). All the gDNAs were used in a total of 3 ug of DNA per PCR reaction, which consisted of 25 cycles using HiFi hotstart polymerase (KAPA Biosystems) with Illumina sequencing-comparable primers. The final PCR product was run on a gel and the right size fragment (354 bp) was gel extracted and sequenced on a NextSeq (Illumina).

### **CRISPR screen data analysis**

bcl2fastq and PoolQ were used to map raw data to gRNA reads. Mageck\_nest was used for differential gene analyses (58), and beta\_1|beta from mageck\_nest was treated as logFC. The p-values were converted to relative rankings through signed log p-values. The top and bottom 5% were regarded as significant genes that affect ER homeostasis or UPR activity in DMSO or Tm-treated ER stress conditions, respectively. Essential genes (59) were excluded from the significant genes in the Tm-mediated ER stress condition for further analysis.

### **Lentivirus production**

To generate lentiviruses containing individual sgRNAs for all follow-up experiments, 1 ug of the sgRNA lentivector, 1 ug of PAX2 vector and 0.1 ug VSVg vector were transfected into 293T cells using Lipofectamine2000 (ThermoFisher, 11668030) according to the manufacturer's instructions. Cell supernatants were collected at 48 and 72 hours. Media was concentrated using a Lenti-X concentrator (Takara) after removing debris by centrifugation according to the manufacturer's protocol. Viruses were aliquoted and stored at -80°C. Viruses were transduced with MOI less than 0.5.

### **FACS analysis for cell viability**

Single-cell suspensions were obtained by TrypLE treatment. Cells were incubated with 7-AAD and Pacific Blue Annexin V dye (BioLegend) in room temperature 15min for live/dead staining and analyzed using CytoFLEX Cytometer (Beckman).

### **Quantitative RT-PCR**

Cells were harvested and RNA isolated using Direct RNAzol (Zymo Research) according to manufacturers' instructions. cDNA was made using RNA with PrimeScript RT Mix (Clontech) and diluted 10 times with deionized water. PCR samples were prepared by mixing cDNA, specific primers, and iTaq SYBR Green Supermix (Biorad), and quantitative PCR reactions were run on a CFX96 instrument (Biorad).

### **Immunoblot**

Cells were lysed with RIPA lysis buffer containing Protease & Phosphatase Inhibitor Cocktails (Sigma), and Benzonase Nuclease (Sigma). Lysates were incubated on ice for 20 min and centrifuged at 12,000 g x 5 min at 4°C. Supernatants were transferred and mixed with 4x protein loading dye containing DTT. Samples were run on the SDS-PAGE and transferred using I-Blot (Invitrogen). Western blots were performed according to general protocol using the primary antibodies for QRICH1 (Sigma-Aldrich, HPA037677), ATF4 (Cell signaling, #11815), p-eIF2 $\alpha$  (Ser51) (Cell signaling, #3398), cleaved CASP3 (Cell signaling, #9664), SRP72 (Abcam, ab200199), SEC61B (Proteintech, 15087-1-AP), TRAM1 (LSbio, LS-C313140), and ACTB for overnight at 4°C. HRP signals from the secondary antibodies were detected using Hyblot Autoradiography Film (Thomas Scientific). Signals on x-ray film were normalized using ImageJ (60).

### **Immunostaining**

Cells were fixed in 4% paraformaldehyde followed by permeabilization with 0.3% Triton X-100 for 10 min. After extensive washing with PBS, the cells were incubated in blocking buffer (5% BSA, PBS) for 1 h at RT and then incubated with antibodies for QRICH1, DDIT3 (Cell signaling, #2895s), RTN4 (Abcam, ab47085), FLAG (Sigma, F3165) in blocking buffer at 4°C overnight. Cells were washed extensively and incubated with Alexa488- or Alexa647-conjugated secondary antibodies in blocking buffer for 1 h at RT. After another round of washing, cells were stained with DAPI for 10 min for confocal microscopy analysis.

### **Chromatin-immunoprecipitation and sequencing**

To induce ER-stressed conditions, wild type or QRICH1 knockout HT29 cells were treated with 0.3 ug/ml of Tm for 14 h and performed chromatin immunoprecipitation as previously described with minor modifications (61). Briefly, cells were fixed with 1% formaldehyde and crosslinking

was quenched with glycine. Cell lysates were sonicated using a Branson 450 Ultrasonic 102C sonicator. Lysates were then incubated with anti-QRICH1 antibody (ThermoFisher), anti-ATF4 antibody (Cell signaling), or anti-normal rabbit IgG (Cell signaling) overnight at 4 °C. Protein G dynabeads (Invitrogen) were added for 4 h and subsequent washes were performed with RIPA buffer (0.1% SDS, 0.1% DOC, 1% Triton X-100, 1 mM EDTA, 10 mM Tris-HCl pH 8.1, 150 mM NaCl), high-salt RIPA buffer (RIPA with 500 mM NaCl), LiCl buffer (10 mM Tris-HCl pH 8.1, 250 mM LiCl, 0.5% Triton X-100, 0.5% DOC) and PBS. DNA was incubated overnight at 65 °C to reverse crosslinking and enriched gDNA fragments were extracted after RNase A and Proteinase K treatment. DNA libraries were generated using the NEBNext Ultra II DNA Library Prep Kit for Illumina Sequencing according to the manufacturer's protocol.

### **ChIP-seq analysis**

ChIP-seq data analysis was performed following the ENCODE ChIP-seq Pipeline. Raw sequencing data were aligned to the reference genome (Human GRCh38) using BWA (62), SAMtools (63) and Picard's MarkDuplicates (64) were used for post-alignment filtering, including to remove unmapped, multi-mapped reads, and PCR duplicate reads. The retained high-quality alignment results were used to call peaks by MACS2 (65) against an IgG control with a p-value threshold of 0.01. ChIPseeker was used to annotate peak distribution and peaks were visualized using the WashU Epigenome Browser.

### **Sample preparation for RNA sequencing**

Wild type or QRICH1 knockout HT29 cells were treated with DMSO or 0.3 ug/ml of Tm for 14 h and isolated RNA by TCL buffer (QIAGEN) treatment. RNA-seq libraries were generated with three biological replicates according to previously described method (66).

### **RNA-seq analysis**

Raw RNA-seq reads were processed by Trimmomatic (67) to remove the adapter sequences and low quality bases. Sequencing data was aligned to the reference genome (Human GRCh38) using STAR. Raw read counts from STAR were analyzed using DESeq2 (68) with shrinkage estimator apeglm (69) to identify differentially expressed genes. Genes with low mean value ( $\leq 10$ ) were filtered. The genes were defined as differentially expressed if the fold change was greater than or equal to 1.2 with a p value  $< 0.05$ . Metascape (70) was used to illustrate the biological role of differentially expressed genes.

### **Metabolic labeling with puromycin**

Protein synthesis activity was assessed as previously described (71) with a slight modification. For this experiment, we used the Hygromycin selection vector instead of puromycin to prevent the interference by the puromycin resistant gene. Briefly, cells were treated with DMSO or Tm for the indicated time before labeling. Then, the media was replaced with labeling medium containing 10 ug/ml of puromycin for 20 min. Cells were lysed and protein concentration was measured by BCA assay. Equal amounts of protein were loaded in the gel and transferred to the membrane. Signals were detected by anti-puromycin antibody (Sigma, MABE343). Signals on x-ray film were normalized using ImageJ.

### **Immunofluorescence with tissue array**

QRICH1 staining was performed on a tissue array of human colon and liver samples of inflamed and healthy individuals (TMA, US BioMAX, #CO245 and LV20812b ) according to the manufacturer's suggestion. After deparaffinization and baking of the tissue sections using the standard protocol, samples were incubated with QRICH1 antibody (1:100) overnight at 4°C, and then incubated with secondary antibodies (1:1000) at room temperature for 1 h. Nuclei were stained with Hoechst 33342 (1: 5000, ThermoFisher). The signal intensities in the nuclei were quantified using ImageJ.

### **Lentivirus Transduction of Organoids**

Mouse organoids from 5 wells were harvested and used for transduction. After washing with PBS, samples were collected, centrifuged at 400 g x 5 min. After removal of the supernatant, cells were suspended with TrypLE and a wash buffer was added (Advanced DMEM F12 containing 10% FBS, GlutaMax and Pen/Strep). Cells were centrifuged at 600 g for 5 min, resuspended with 250 ul of viral suspension and then transferred to a 48-well plate. After centrifugation at 600 g for 90 min at 37°C, samples were incubated at 37°C for another 2 hours. Cells were collected into a 1.5ml tube and centrifuged at 900 g for 5 min and resuspended with 60 ul of Matrigel. 15 ul of samples were plated each on a 24-well plate. Lentivirus-containing medium was removed 24 h later and replaced with culture medium. 3 days after transduction, organoids were selected for at least two cell passages in puromycin-containing (3 µg/ml) medium. Once the selection was completed, total protein was extracted to confirm knockout of Qrich1.

### **QRICH1 signature**

To identify the minimal number of genes showing QRICH1 effects on translation & protein secretion, we started with the 278 significant QRICH1 target genes from Figure 5A. Of these, we used only 201 genes, which are up-regulated by QRICH1 and enriched in the translation and secretion pathway (**Fig. 5B**). By comparing these with DEGs from Tm treated primary monolayers, we generated a 29 QRICH1-signature geneset. Module scores of QRICH1-signatures were calculated by the average expression levels of QRICH1\_signature genes using the AddModuleScore function in Seurat.

Fig. S1.

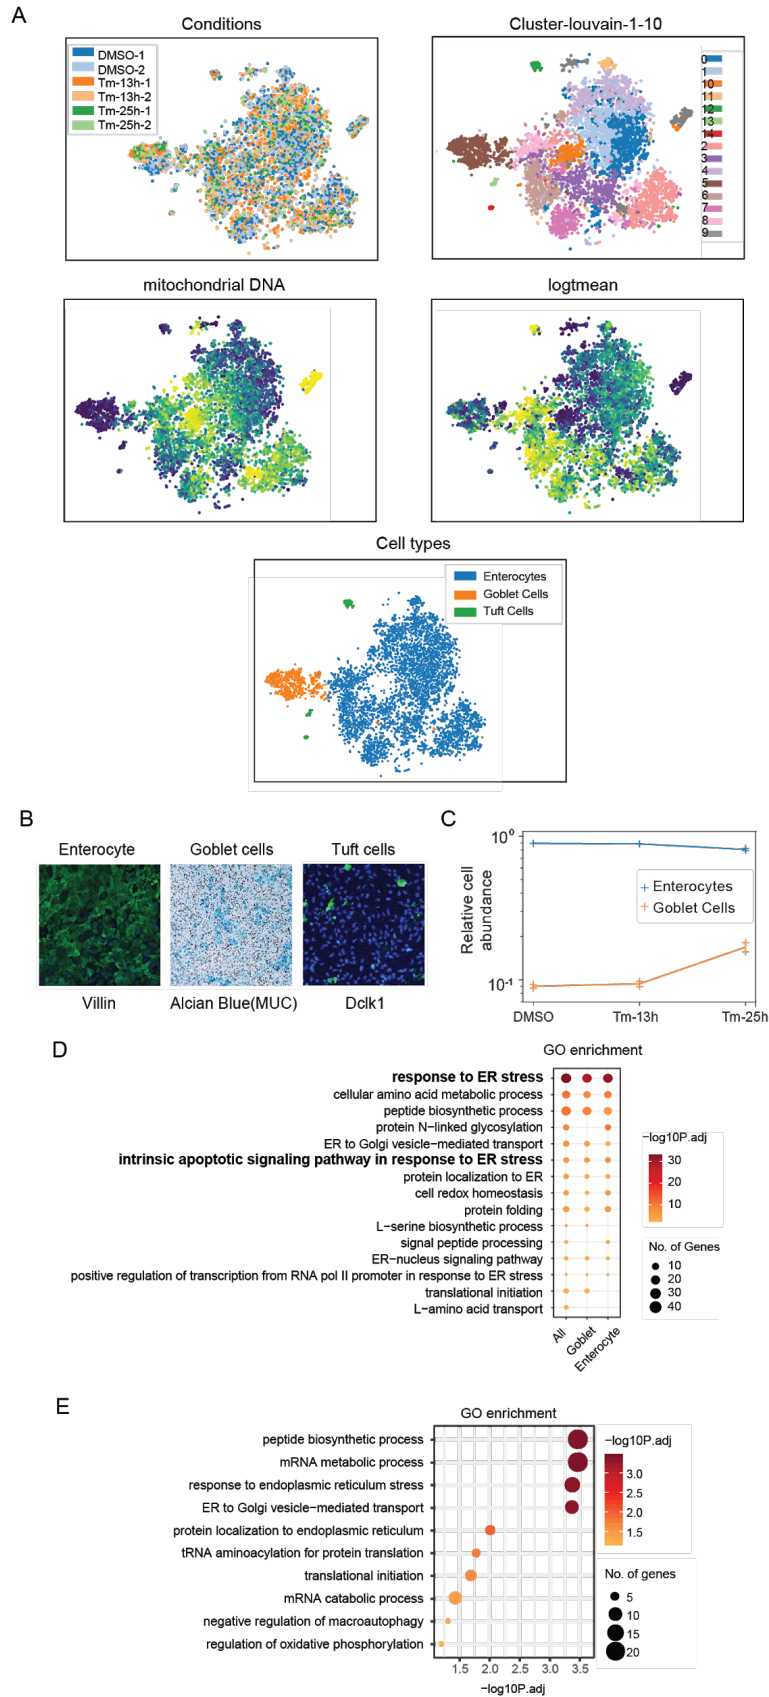



**scRNA-seq of intestinal monolayer cells shows the terminal-UPR signature during ER stress.**

(A) tSNE plots show the clustering of monolayer cells (colored by conditions, clusters, and cell types).

(B) Immunostaining of monolayer cells. Enterocytes, goblet cells, and Tuft cells are detected by Villin, Alcian Blue (Mucin), and Dclk1 staining.

(C) Changes in relative abundance of enterocytes and goblet cells after Tm treatment. Two samples were measured per conditions, with + signs indicating percentage of cells for each measurement.

(D) Gene set enrichment analysis (GSEA) shows enriched pathways in goblet cells and enterocytes upon 13 h of Tm treatment.

(E) GSEA shows the enriched biological processes in the terminal-UPR signature illustrated in Fig. 1H.

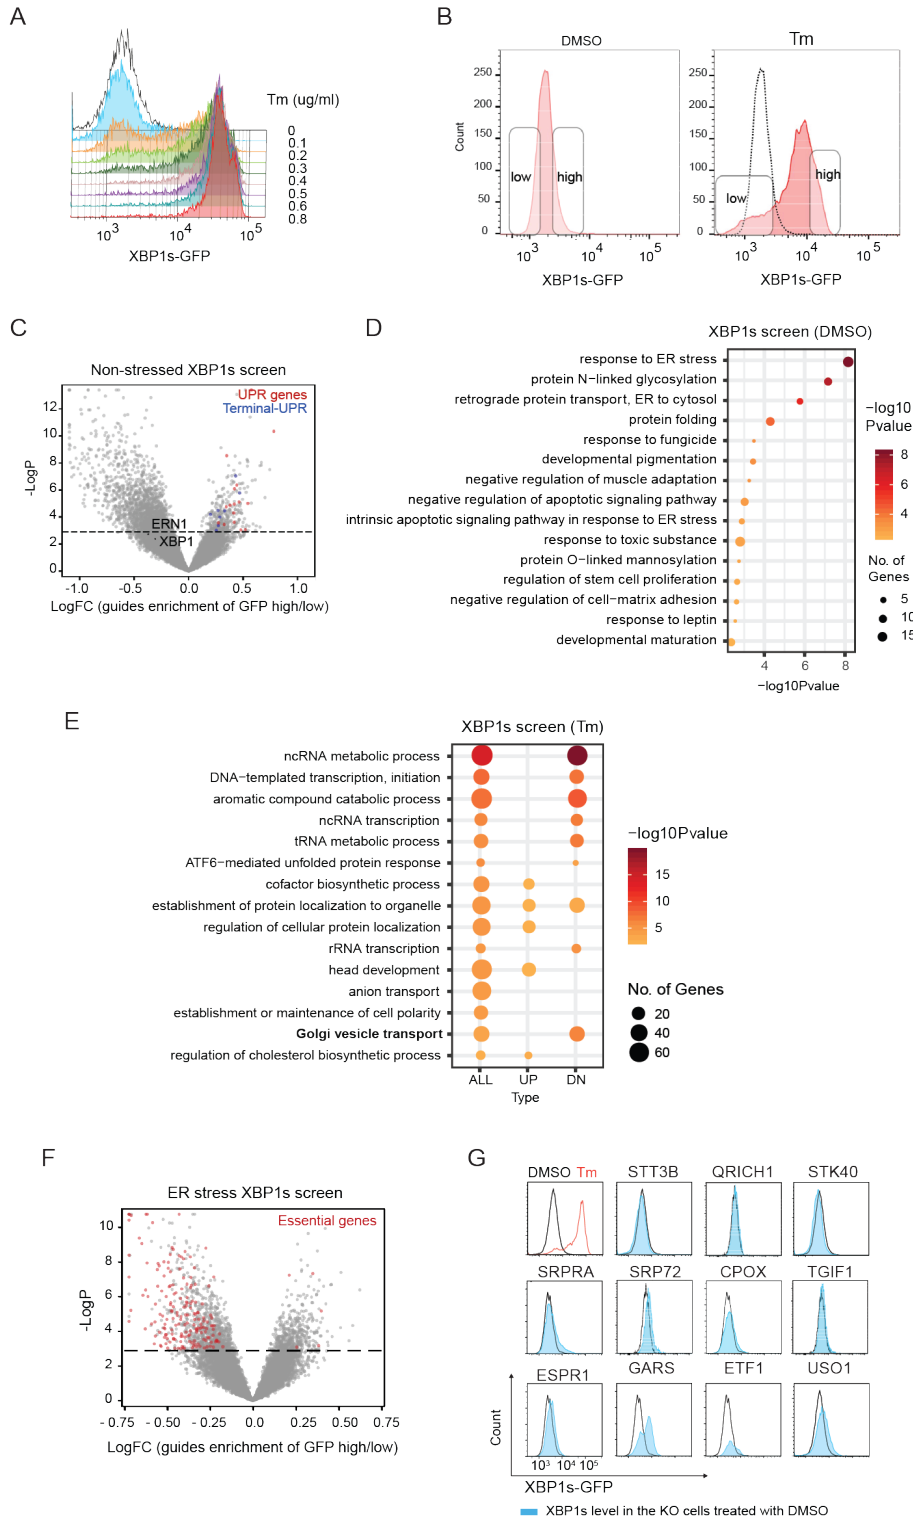

**Fig. S2. XBP1s-GFP reporter screens identify potent regulators of the ER stress-UPR pathway.**

(A) Dose-dependent response to Tunicamycin (Tm). Quantification of spliced XBP1 (XBP1s) level according to GFP intensity using FACS after 14 h of Tm treatment.

(B) Gating strategy. The lowest and highest 15% of cells were sorted out based on the GFP intensities using FACS sorter.

(C) Volcano plot shows the average gRNA enrichments in the non-stressed XBP1s screen. The dashed line indicates the p-value cut-off. Known UPR genes and terminal-UPR genes are highlighted in red and blue, respectively.

(D) GSEA shows the enriched biological processes in the non-stressed XBP1s screen. Only the list of genes for which KO promotes UPR activity is used for the GO analysis. Many of the known ER homeostasis-related GOs are shown on this screen.

(E) GSEA shows enriched biological processes in the stressed XBP1s screen. UP and DN indicate the list of genes for which KO promotes or reduces XBP1s expression in the Tm-treated cells.

(F) Volcano plot of ER stress XBP1s screen shows the distribution of essential genes, highlighted in red.

(G) Measurement of GFP intensities shows the level of XBP1s in wild-type (dashed black) or KO (filled blue) cells treated with DMSO. The symbol indicates the targeted gene. The dashed red line indicates the GFP intensity in the Tm condition.

A

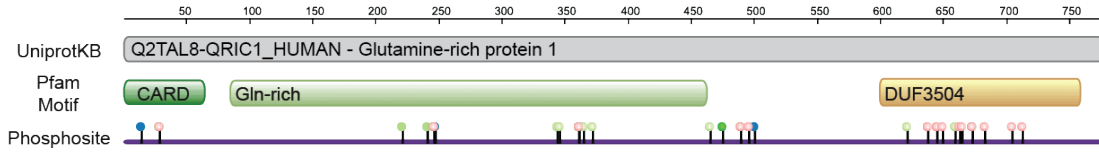

B

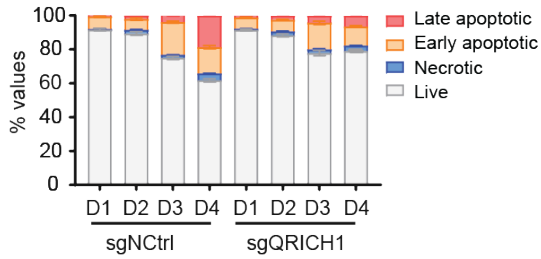

C

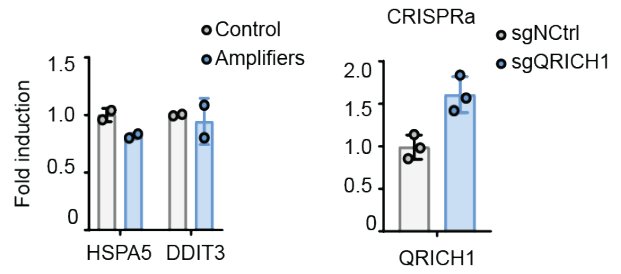

D

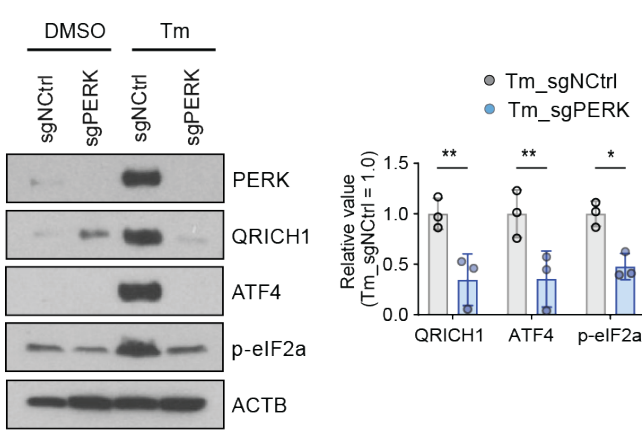

E

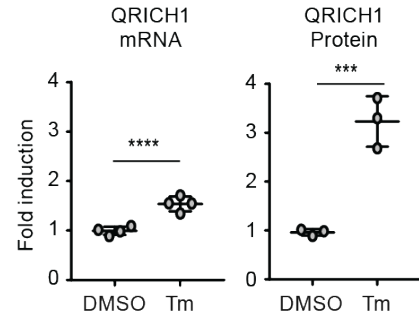

F

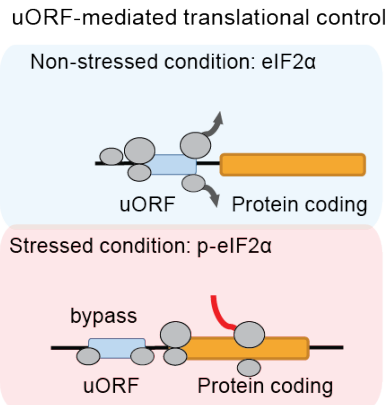

G

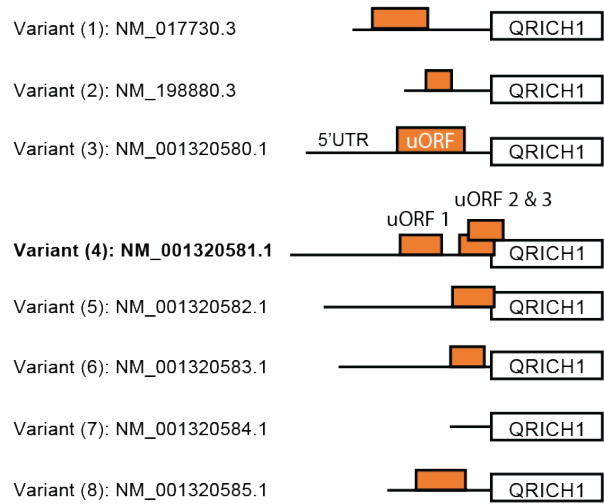

**Fig. S3. QRICH1 regulates cell viability during ER stress.**

(A) Schematic diagram of the domain structure of QRICH1. Figure modified from the RCSB\_PDB: Q2TAL8 (<http://www.rcsb.org/pdb/protein/Q2TAL8>).

(B) The proportion of 7-AAD and/or Annexin V positive cells. sgNCtrl or sgQRICH1 transduced cells treated with Tm for the indicated time (n=2).

(C) Left panel: Measurement of DDIT3 or HSPA5 in HT29 cells after the transduction of CRISPRa amplifiers by qRT-PCR. Right panel: Transcriptional induction of QRICH1 by CRISPRa. Mean value of three guides. Error bars, mean +/- SD.

(D) Immunoblot shows expression patterns of QRICH1 upon Tm treatment in the sgNCtrl or sgPERK transduced HT29 cells. A representative blot is shown (n=3, two-way ANOVA).

(E) Quantification of QRICH1 mRNA (n=4) and protein level (n=3) in cells treated with 0.3ug/ml of Tm for 1 day (multiple *t*-test).

(F) Schematic diagram of upstream open reading frame (uORF) mediated translational control depends on the status of eIF2 $\alpha$  phosphorylation.

(G) Schematic diagram shows QRICH1 mRNA isoforms. All variants encode the same protein — variant 4 was used for QRICH1 reconstitution.

For panels D and E: \**p*<0.05, \*\**p*<0.01, \*\*\**p*<0.005, \*\*\*\**p*<0.0001; error bars, mean +/- SD.

A

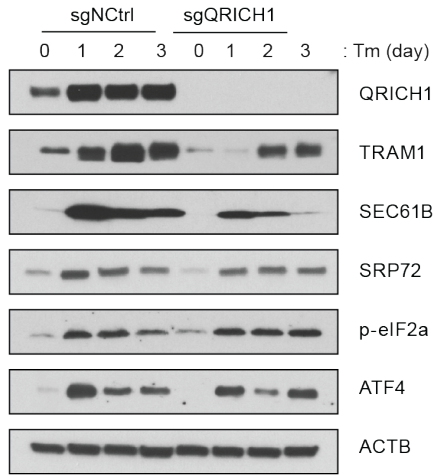

B

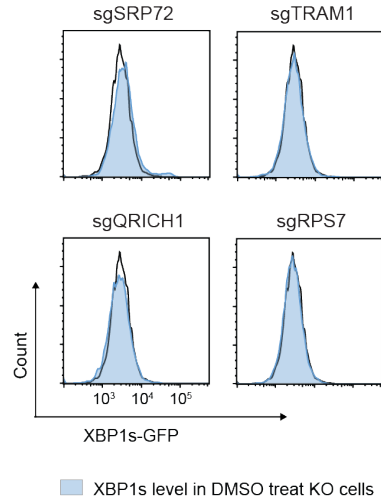

C

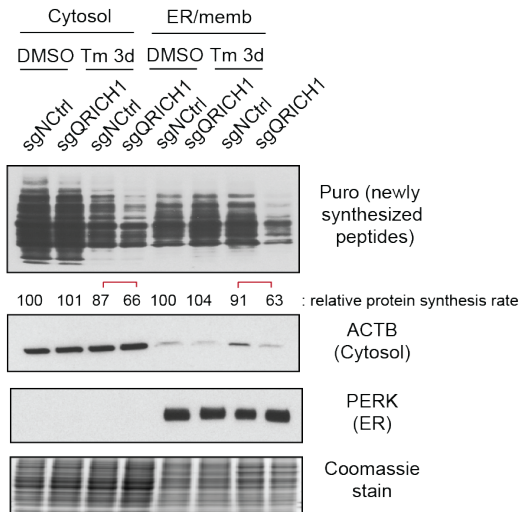

**Fig. S4. QRICH1 facilitates protein secretion during ER stress.**

(A) Immunoblot shows the kinetics of p-eIF2 $\alpha$ , QRICH1, ATF4, and QRICH1-regulated target genes during prolonged ER stress. A representative blot is shown.

(B) FACS analysis shows the level of XBP1s in DMSO-treated wild-type (black line) or sgRNA transduced (filled blue) cells, as measured by GFP intensities. The target gene is indicated above each plot.

(C) Assessment of protein synthesis rate in the cytosolic or ER/membrane fractions detected using anti-puromycin. WT and QRICH1 KO cells were pulse-labeled with puromycin after T<sub>m</sub> treatment for 3 days. The DMSO-sgNCtrl in cytosol and ER/memb were set to 100%, and were used to normalize the data in the cytosol and ER/memb fractions, respectively (n=2). ACTB and PERK were used as markers for cytosol and ER fractions, respectively.

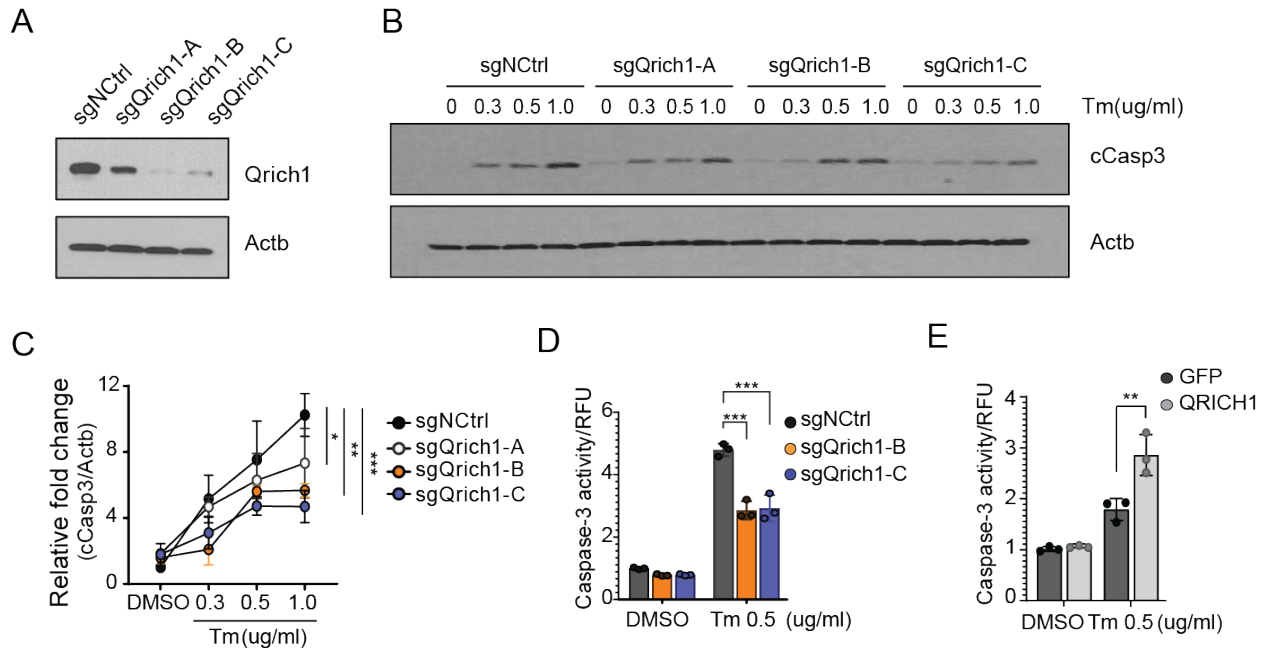



**Fig. S5. QRICH1 regulation during ER stress mediates proteotoxicity in primary mouse intestinal epithelium.**

(A) Immunoblot analysis of WT and Qrich1 knockout (sgQrich1) mouse intestinal monolayers. Three different Cas9 guides are noted A, B, and C.

(B and C) WT or Qrich1 KO mouse intestinal monolayer cells were exposed to an indicated dose of Tm for 24 h. Quantification of cleaved Caspase 3 in those cells are measured by ImageJ (n=3, two-way ANOVA).

(D) The activity of Caspase 3 was measured by in vitro Caspase 3 assay with fluorogenic Caspase 3 substrate (Z-DEVD-AMC) in WT or Qrich1 KO monolayer cells treated with Tm for 24 h (n=3, two-way ANOVA). RFU, relative fluorescence unit.

(E) Caspase 3 activity in the GFP or human QRICH1 transduced mouse intestinal organoids treated with DMSO or Tm for 24 h (n=3, two-way ANOVA).

For panels C-E: \*p<0.05, \*\*p<0.01, \*\*\*p<0.001, error bars, error bars, mean +/- SD.

A

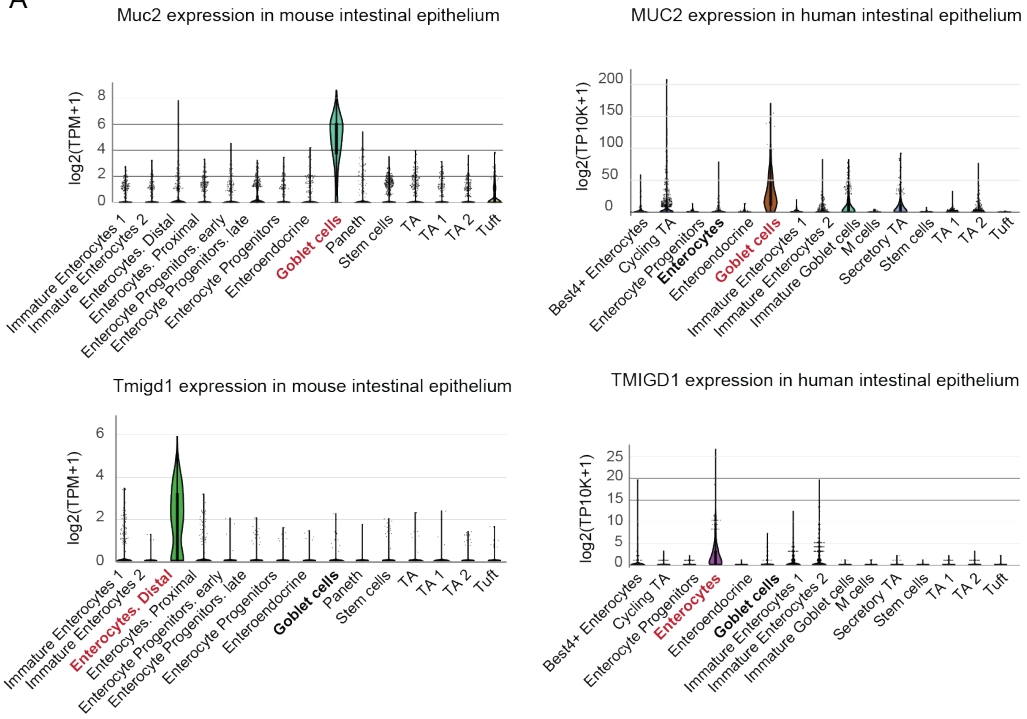

B

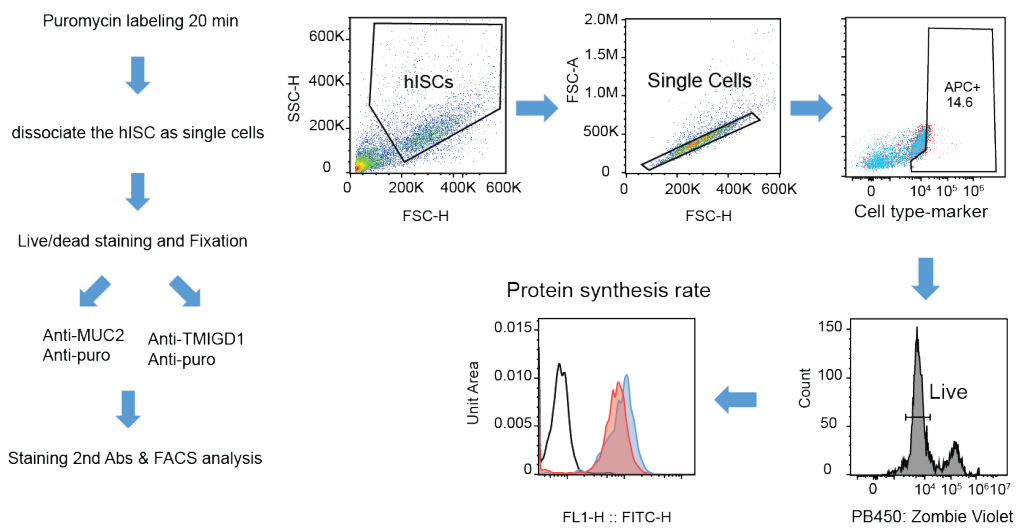

**Fig. S6. Experimental scheme to measuring cell type-specific protein synthesis rate in human intestinal organoids during ER stress.**

(A) Expression patterns of MUC2 and TMIGD1 in the mouse and human intestinal epithelium. (55, 72). TPM denotes transcripts per million, TP10K denotes UMI counts normalized by the total number of UMIs per cell and converted to transcripts-per-10,000.

(B) Schematic of the workflow for hISC experiments and FACS analysis.

A

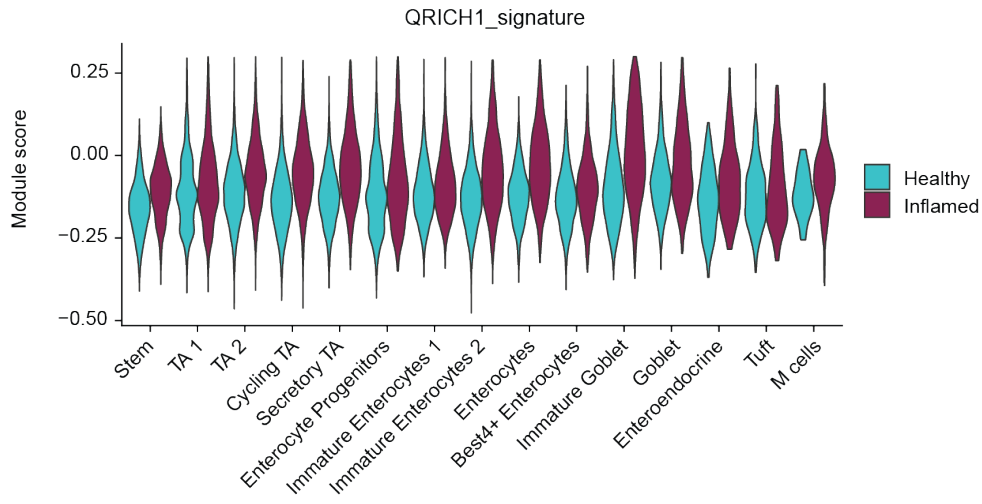

B

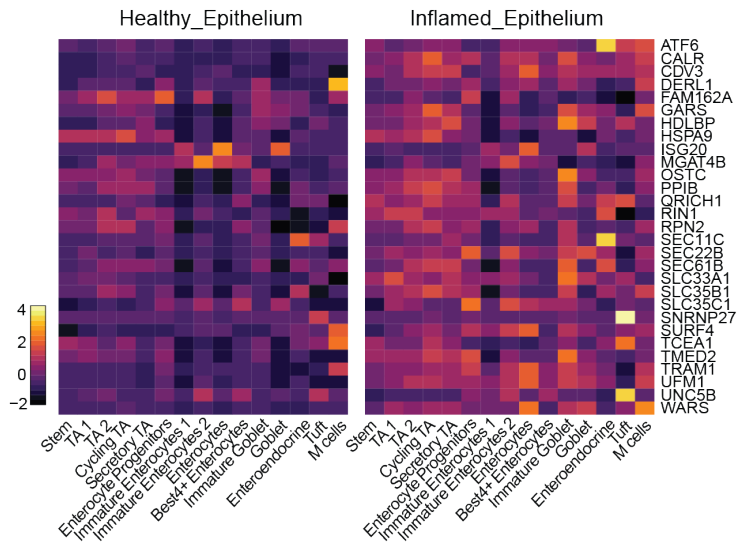

**Fig. S7. Expression of QRICH1 signature in inflamed conditions.**

(A) Module score of the QRICH1\_signature mapped to epithelial cells from the colon of healthy individuals and the inflamed colon of UC patients. Cell types are annotated according to previously annotated marker genes (73).

(B) Heatmap shows the scaled average expression levels of each gene in the QRICH1\_signature across the epithelial cell types in the colon of healthy individuals and patients with ulcerative colitis (inflamed regions).

**Table S1. (separate Excel file)**

Differentially expressed genes for cell subsets and the terminal-UPR geneset from the ER stressed monolayer shown in Fig. 1H.

**Table S2. (separate Excel file)**

CRISPR-Cas9 Genome-wide screen data for ER stress-UPR pathway using the XBP1s-GFP reporter cells in Fig. 2.

**Table S3. (separate Excel file)**

ChIP-seq data using anti-QRICH1 and ATF4 and Gene Ontology results illustrated in Fig. 4.

**Table S4. (separate Excel file)**

Differentially expressed genes between WT and QRICH1 KO cells in response to Tm treatment are listed. Related to Fig. 5A.
